# Supplementary material for: The Histone H3K79 Methyltransferase Dot1L Is Essential for Mammalian Development and Heterochromatin Structure
Source: PubMed Central journal article supplement (PMC2527135; doi:10.1371/journal.pgen.1000190), 2008-09-12

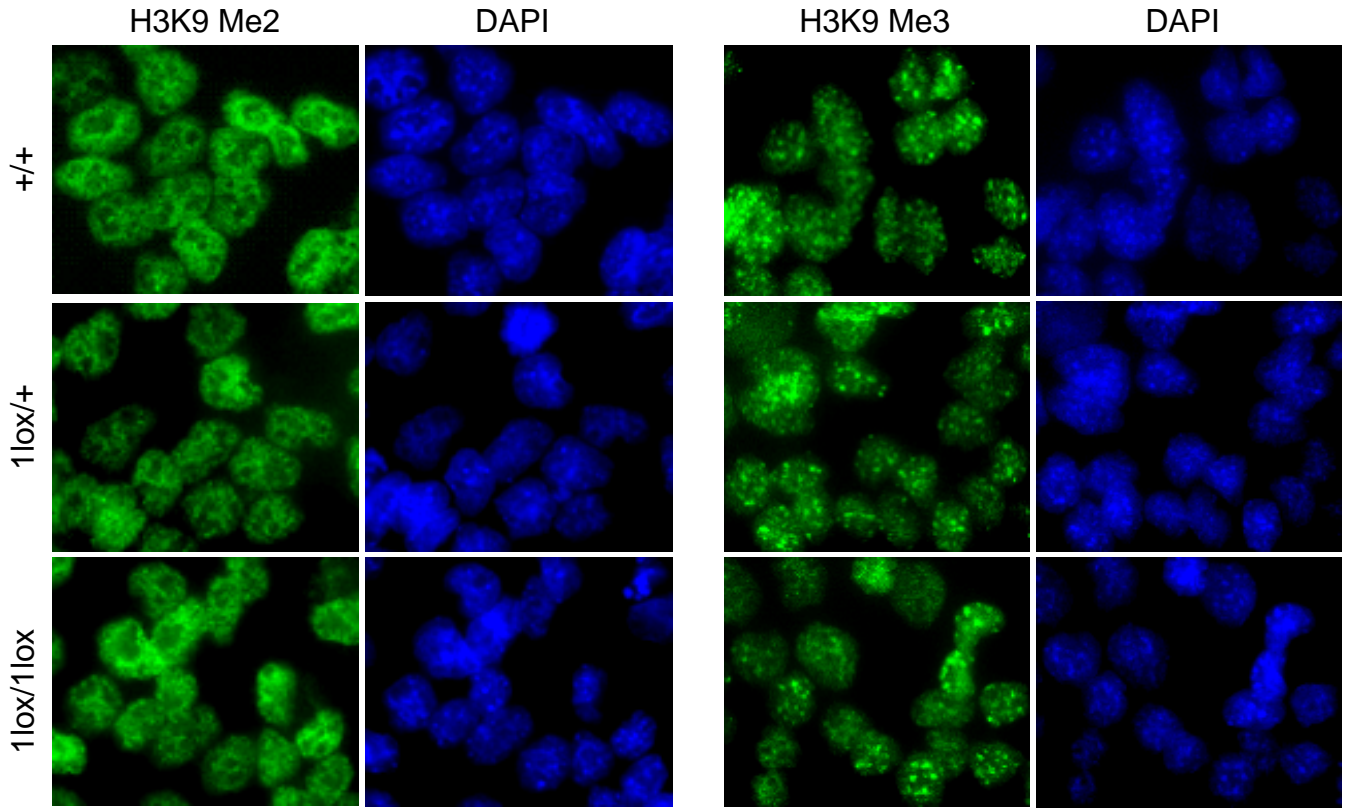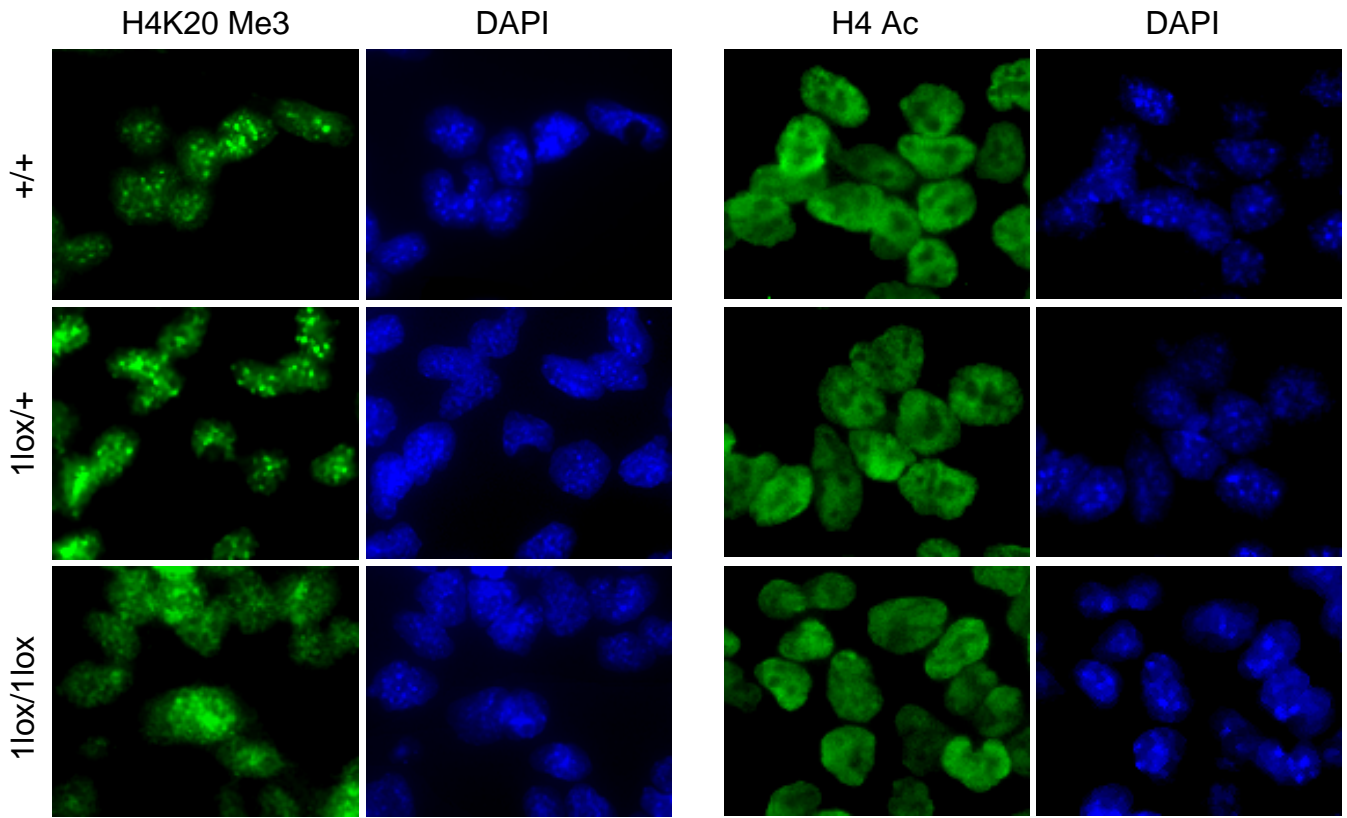

Supplement: pgen.1000190.s003.pdf [file pgen.1000190.s003.pdf]
